# Supplementary material for: Selective activation of TNFR1 and NF-κB inhibition by a novel biyouyanagin analogue promotes apoptosis in acute leukemia cells
Source: Springer Nature journal article supplement (doi:10.1186/s12885-016-2310-5), 2016-04-20
Supplement: MOESM1 [file 10041738]

| <b>Gene</b>                   | <b>Forward Primer</b>                 | <b>Reverse Primer</b>                 |
|-------------------------------|---------------------------------------|---------------------------------------|
| <b>IL-1<math>\beta</math></b> | 5'TCCAGCTACGAATCTCCGAC <sub>3</sub> ' | 5'ACCAGCATCTTCCTCAGCTT <sub>3</sub> ' |
| <b>IL-6</b>                   | 5'AGTCCTGATCCAGTTCCTGC <sub>3</sub> ' | 5'CATTTGTGGTTGGGTCAGGG <sub>3</sub> ' |
| <b>IL-8</b>                   | 5'CAGTTTTGCCAAGGAGTGCT <sub>3</sub> ' | 5'TTGGGGTGGAAAGGTTTGG <sub>3</sub> '  |
| <b>BCL-xL</b>                 | 5'TAAACTGGGGTCGCATTGT <sub>3</sub> '  | 5'TGGATCCAAGGCTCTAGGTG <sub>3</sub> ' |
| <b>BCL-2</b>                  | 5'CAGCCCAGACTCACATCACC <sub>3</sub> ' | 5'CATGTGTGTGGAGAGCGTCA <sub>3</sub> ' |
| <b>BCL-3</b>                  | 5'AAGAAACCGTGCAGCTCTTG <sub>3</sub> ' | 5'CCGCTCTTAATGTCCACTGC <sub>3</sub> ' |
| <b>XIAP</b>                   | 5'TGGGGTTCAGTTTCAAGGAC <sub>3</sub> ' | 5'TGCAACCAGAACCTCAAGTG <sub>3</sub> ' |
| <b>cIAP1</b>                  | 5'GCATTTTCCCAACTGTCCAT <sub>3</sub> ' | 5'ATTCGAGCTGCATGTGTCTG <sub>3</sub> ' |
| <b>cIAP2</b>                  | 5'GCATTTTCCCAACTGTCCAT <sub>3</sub> ' | 5'ATTTTCCACCACAGGCAAAG <sub>3</sub> ' |
| <b>cFLIP</b>                  | 5'TGTGCCGGGATGTTGCTATA <sub>3</sub> ' | 5'CCGACAGACAGCTTACCTCT <sub>3</sub> ' |
| <b>MCL-1</b>                  | 5'ATGCCAAACCAGCTCCTACT <sub>3</sub> ' | 5'GCTGCATCGAACCATTAGCA <sub>3</sub> ' |
| <b>Survivin</b>               | 5'GACGACCCCATAGAGGAACA <sub>3</sub> ' | 5'GACAGAAAGGAAAGCGCAAC <sub>3</sub> ' |
| <b>FADD</b>                   | 5'ACACAGAGAAGGAGAACGCA <sub>3</sub> ' | 5'GCCTGCTGAACCTCTTGTA <sub>3</sub> '  |
| <b>GAPDH</b>                  | 5'CTGACTTCAACAGCGACACC <sub>3</sub> ' | 5'AAAGTGGTCGTTGAGGGCA <sub>3</sub> '  |
